# Supplementary material for: The Combined Use of Automated Milking System and Sensor Data to Improve Detection of Mild Lameness in Dairy Cattle
Source: Animals (Basel). 2023 Mar 28;13(7):1180. doi: 10.3390/ani13071180 (PMC10093521; doi:10.3390/ani13071180)
Supplement: Supplementary file 1 [file animals-13-01180-s001.zip › animals-2289157-supplementary.pdf]

**Table S1. Questionnaire on farm management and husbandry conditions**

| <b>N</b>                   | <b>Question</b>                                               | <b>Answers</b>                                                                                                                                                                                  | <b>Included in model</b>                                                                                                                     |
|----------------------------|---------------------------------------------------------------|-------------------------------------------------------------------------------------------------------------------------------------------------------------------------------------------------|----------------------------------------------------------------------------------------------------------------------------------------------|
| <b>General Information</b> |                                                               |                                                                                                                                                                                                 |                                                                                                                                              |
| 1                          | Farm run as full-time or spare-time job?                      | <ul style="list-style-type: none"> <li>• Full-time</li> <li>• Spare-time</li> </ul>                                                                                                             | No, all farmers working full-time                                                                                                            |
| 2                          | Conventional or organic farm?                                 | <ul style="list-style-type: none"> <li>• Conventional</li> <li>• Organic</li> </ul>                                                                                                             | Yes                                                                                                                                          |
| <b>Feeding</b>             |                                                               |                                                                                                                                                                                                 |                                                                                                                                              |
| 3                          | Time for rumen adjustment when changing silage?               | <ul style="list-style-type: none"> <li>• &lt; 5 days</li> <li>• &gt; 5 days</li> </ul>                                                                                                          | Yes                                                                                                                                          |
| 4                          | Proportion of concentrate?                                    | <ul style="list-style-type: none"> <li>• &gt; 45%</li> <li>• 35 – 45%</li> <li>• &lt; 35%</li> </ul>                                                                                            | Yes                                                                                                                                          |
| 5                          | Proportion of structured feed?                                | <ul style="list-style-type: none"> <li>• No calculation</li> <li>• ____ %</li> </ul>                                                                                                            | Yes                                                                                                                                          |
| 6                          | Is the length of structured feed particles above 3cm?         | <ul style="list-style-type: none"> <li>• Yes</li> <li>• No</li> </ul>                                                                                                                           | No, all farmers answered Yes                                                                                                                 |
| 7                          | Are feed analyses done?                                       | <ul style="list-style-type: none"> <li>• Yes, mostly</li> <li>• Yes, sometimes</li> <li>• No</li> </ul>                                                                                         | Yes                                                                                                                                          |
| 8                          | Are feed rations calculated throughout the year?              | <ul style="list-style-type: none"> <li>• Yes</li> <li>• No</li> </ul>                                                                                                                           | Yes                                                                                                                                          |
| 9                          | Addition of minerals and vitamins to the ration?              | <ul style="list-style-type: none"> <li>• No</li> <li>• Yes, for cows in milk</li> <li>• Yes, for dry cows</li> <li>• Yes, for youngstock</li> </ul>                                             | Yes                                                                                                                                          |
| 10                         | How is the concentrate fed?                                   | <ul style="list-style-type: none"> <li>• Individually</li> <li>• Per group</li> <li>• Mixed form</li> </ul>                                                                                     | No, as all farms feed an upgraded mixed ration at the feeding trough and individually assign the remaining concentrate over the AMS          |
| 11                         | Which animal groups share the same feed ration?               | <ul style="list-style-type: none"> <li>• Early-lactating cows</li> <li>• Late-lactating cows</li> <li>• Dry cows</li> <li>• Youngstock &lt; 1 year</li> <li>• Youngstock &gt; 1 year</li> </ul> | No, only cows in milk were used in the final model and early-lactating and late-lactating animals receive the same feed ration on all farms. |
| 12                         | Was the feeding management changed within the last few years? | <ul style="list-style-type: none"> <li>• Yes</li> <li>• No</li> </ul>                                                                                                                           | No, no changes during study period                                                                                                           |
| <b>Husbandry</b>           |                                                               |                                                                                                                                                                                                 |                                                                                                                                              |
| 13                         | Is there alpine pasture?                                      | <ul style="list-style-type: none"> <li>• No</li> <li>• Yes, for cows in milk</li> <li>• Yes, for dry cows</li> <li>• Yes, for youngstock</li> </ul>                                             | Yes                                                                                                                                          |

|                      |                                                                   |                                                                                                                                                     |                                                           |
|----------------------|-------------------------------------------------------------------|-----------------------------------------------------------------------------------------------------------------------------------------------------|-----------------------------------------------------------|
| 14                   | Are cooling systems (ventilator, air tubes) available?            | <ul style="list-style-type: none"> <li>• No</li> <li>• Yes, for cows in milk</li> <li>• Yes, for dry cows</li> <li>• Yes, for youngstock</li> </ul> | Yes                                                       |
| 15                   | Are cow showers available?                                        | <ul style="list-style-type: none"> <li>• No</li> <li>• Yes, for cows in milk</li> <li>• Yes, for dry cows</li> <li>• Yes, for youngstock</li> </ul> | Yes                                                       |
| 16                   | Are animals kept on pasture?                                      | <ul style="list-style-type: none"> <li>• No</li> <li>• Yes, for cows in milk</li> <li>• Yes, for dry cows</li> <li>• Yes, for youngstock</li> </ul> | Yes                                                       |
| 17                   | If animals are kept on pasture, what type of procedure?           | <ul style="list-style-type: none"> <li>• Whole day</li> <li>• At night</li> <li>• Two times a day</li> <li>• other</li> </ul>                       | Yes                                                       |
| 18                   | For how many days are animals kept on pasture?                    | <ul style="list-style-type: none"> <li>• ____</li> </ul>                                                                                            | Yes                                                       |
| 19                   | How many hectares of pasture are available?                       | <ul style="list-style-type: none"> <li>• ____</li> </ul>                                                                                            | Yes                                                       |
| 20                   | Do cows have access to outdoor areas?                             | <ul style="list-style-type: none"> <li>• Yes, paved outdoor area</li> <li>• Yes, but not paved</li> <li>• No</li> </ul>                             | Yes                                                       |
| 21                   | Do they have permanent access?                                    | <ul style="list-style-type: none"> <li>• Yes</li> <li>• No</li> </ul>                                                                               | No, as all farms with outdoor areas give permanent access |
| 22                   | How are animals kept in tie-stalls?                               | <ul style="list-style-type: none"> <li>• No tie-stall</li> <li>• Other methods</li> </ul>                                                           | No, all cows kept in free stall barns                     |
| 23                   | How are animals added to the herd?                                | <ul style="list-style-type: none"> <li>• Abruptly</li> <li>• Visual contact beforehand</li> <li>• differing</li> </ul>                              | Yes                                                       |
| 24                   | Are there calving pens?                                           | <ul style="list-style-type: none"> <li>• Yes</li> <li>• No</li> </ul>                                                                               | No, all farms have calving pens                           |
| 25                   | How many cows are kept in the calving pen?                        | <ul style="list-style-type: none"> <li>• One cow</li> <li>• More cows</li> </ul>                                                                    | Yes                                                       |
| 26                   | How often is the calving pen cleaned?                             | <ul style="list-style-type: none"> <li>• After each calving</li> <li>• Less often</li> </ul>                                                        | No, no calving pen is cleaned after each calving          |
| 27                   | For how long are cows kept in the calving pen after giving birth? | <ul style="list-style-type: none"> <li>• ____ days</li> </ul>                                                                                       | Yes                                                       |
| 28                   | For how many days before calving are heifers added to the herd?   | <ul style="list-style-type: none"> <li>• ____ days</li> <li>• Only after calving</li> <li>• All animals are kept in the same group</li> </ul>       | Yes                                                       |
| <b>Hoof trimming</b> |                                                                   |                                                                                                                                                     |                                                           |
| 29                   | On which animals is hoof trimming performed?                      | <ul style="list-style-type: none"> <li>• All cows in milk and dry cows</li> </ul>                                                                   | Yes                                                       |

|                          |                                            |                                                                                                                                                                                       |                                   |
|--------------------------|--------------------------------------------|---------------------------------------------------------------------------------------------------------------------------------------------------------------------------------------|-----------------------------------|
|                          |                                            | <ul style="list-style-type: none"> <li>• All cows in milk without dry cows</li> <li>• Only lame cows</li> <li>• All heifers</li> <li>• Only lame heifers</li> <li>• others</li> </ul> |                                   |
| 30                       | Are footbaths used?                        | <ul style="list-style-type: none"> <li>• Yes</li> <li>• No</li> </ul>                                                                                                                 | No, no footbaths used             |
| 31                       | How often are animals scored for lameness? | <ul style="list-style-type: none"> <li>• 1-2 times per month</li> <li>• 1-2 times per month with documentation</li> <li>• never</li> </ul>                                            | No, all farmers answered the same |
| <b>Barn Measurements</b> |                                            |                                                                                                                                                                                       |                                   |
| 32                       | Inclined feeding fence?                    | <ul style="list-style-type: none"> <li>• Yes</li> <li>• No</li> </ul>                                                                                                                 | Yes                               |
| 33                       | Cubicle Bedding Height?                    | <ul style="list-style-type: none"> <li>• Measured on four cubicles on three different places</li> </ul>                                                                               | Yes                               |
| 34                       | Cubicle Bed Length?                        | <ul style="list-style-type: none"> <li>• Measured on four cubicles</li> </ul>                                                                                                         | Yes                               |
| 35                       | Cubicle Width?                             | <ul style="list-style-type: none"> <li>• Measured on four cubicles</li> </ul>                                                                                                         | Yes                               |
| 36                       | Curb?                                      | <ul style="list-style-type: none"> <li>• Measured on four cubicles</li> </ul>                                                                                                         | Yes                               |
| 37                       | Brisket Board?                             | <ul style="list-style-type: none"> <li>• Measured on four cubicles</li> </ul>                                                                                                         | Yes                               |
| 38                       | Height of Neck rail?                       | <ul style="list-style-type: none"> <li>• Measured on four cubicles</li> </ul>                                                                                                         | Yes                               |
| 39                       | Neck rail Diagonal?                        | <ul style="list-style-type: none"> <li>• Measured on four cubicles</li> </ul>                                                                                                         | Yes                               |
| 40                       | Abnormal lying behavior in cows?           | <ul style="list-style-type: none"> <li>• Yes</li> <li>• No</li> </ul>                                                                                                                 | Yes                               |
| 41                       | Damaged flooring?                          | <ul style="list-style-type: none"> <li>• Yes</li> <li>• No</li> </ul>                                                                                                                 | Yes                               |
| 42                       | Slip-resistant flooring?                   | <ul style="list-style-type: none"> <li>• Yes</li> <li>• Partly</li> <li>• No</li> </ul>                                                                                               | Yes                               |
| 43                       | Type of flooring?                          | <ul style="list-style-type: none"> <li>• Slatted</li> <li>• Solid</li> <li>• Rubber mats</li> </ul>                                                                                   | Yes                               |
| 44                       | Steps or obstacles within the barn?        | <ul style="list-style-type: none"> <li>• Yes</li> <li>• No</li> </ul>                                                                                                                 | Yes                               |
| 45                       | Width of feeding alleys?                   | <ul style="list-style-type: none"> <li>• _____</li> </ul>                                                                                                                             | Yes                               |
| 46                       | Width of walking alleys?                   | <ul style="list-style-type: none"> <li>• _____</li> </ul>                                                                                                                             | Yes                               |
| 47                       | Number of drinkers/troughs?                | <ul style="list-style-type: none"> <li>• _____</li> </ul>                                                                                                                             | Yes                               |
| 48                       | Are areas for lying down clean?            | <ul style="list-style-type: none"> <li>• Yes, more than 2/3 are clean</li> </ul>                                                                                                      | Yes                               |

|    |                                                |                                                                                                                    |     |
|----|------------------------------------------------|--------------------------------------------------------------------------------------------------------------------|-----|
|    |                                                | <ul style="list-style-type: none"> <li>No, more than 1/3 is dirty</li> </ul>                                       |     |
| 49 | Are animals clean?                             | <ul style="list-style-type: none"> <li>Yes, more than 2/3 are clean</li> <li>No, more than 1/3 is dirty</li> </ul> | Yes |
| 50 | How many cows have injuries or swollen joints? | <ul style="list-style-type: none"> <li>___ %</li> </ul>                                                            | Yes |

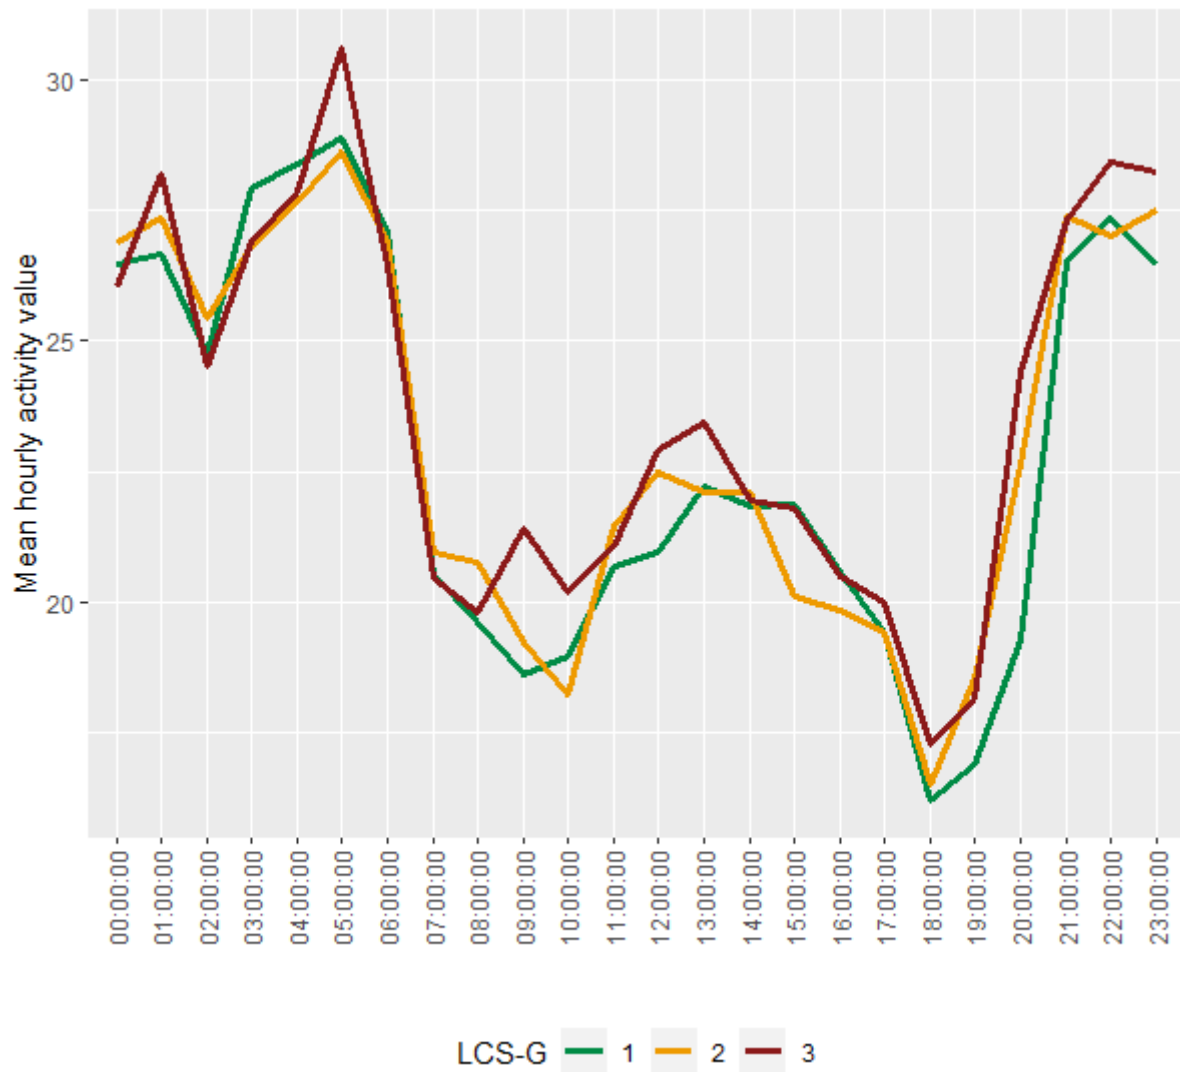

Figure S1: Mean hourly activity values (in minutes) for sensor parameter 'Rumination' showing no visible reduction for LCS-G 2 and LCS-G 3 cows.

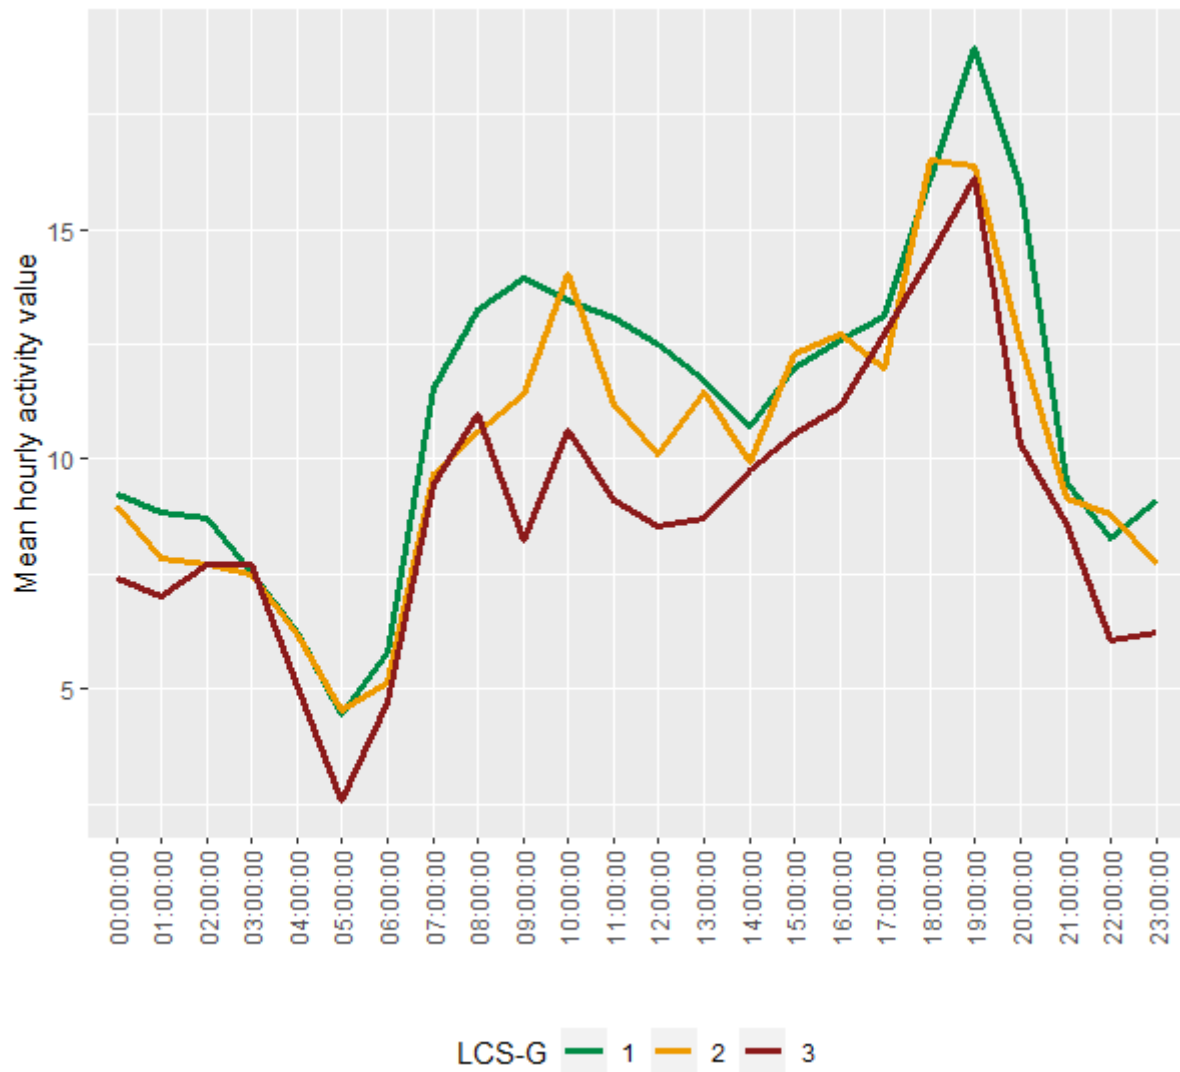

Figure S2: Mean hourly activity values (in minutes) for sensor parameter 'Eating' showing a visible reduction for LCS-G 2 and LCS-G 3 cows.
